# Supplementary material
Source: publisher site journal article supplement (https://www.dovepress.com/article/524947)
Supplement: Supplementary file 1 [file Supplementary%20Tables.docx]

Supplementary Table 1.The main chemical components of CD.

| PM | RT/min | Molecular formula | Ion mode | Detected mass | Expected mass | Error(ppm) | Secondary Fragments(MS/MS) | Compound name |
| --- | --- | --- | --- | --- | --- | --- | --- | --- |
| 1 | 0.97 | C4H6O5 | [M-H]- | 133.0132 | 133.01424 | -7.97 | 115.11,71.01 | Malic acid |
| 2 | 12.05 | C7H6O3 | [M-H]- | 137.0233 | 137.02441 | -7.88 | 93.03 | p-Hydroxybenzoic acid |
| 3 | 14.77 | C16H18O9 | [M-H]- | 353.0884 | 353.0878 | 1.64 | 191.06 | Chlorogenic acid |
| 4 | 17.20 | C8H8O3 | [M-H]- | 151.0392 | 151.04007 | -5.96 | 136.02,102.03 | Vanillin |
| 5 | 18.07 | C9H8O3 | [M-H]- | 163.0393 | 163.04006 | -4.91 | 119.04 | p-Coumaric acid |
| 6 | 20.36 | C9H6O4 | [M-H]- | 177.0187 | 177.01933 | -3.50 | 177.02,129.02 | [5,7-Dihydroxychromone](https://www.chemsrc.com/en/cas/31721-94-5_429702.html) |
| 7 | 22.48 | C7H6O5 | [M-H]- | 169.0151 | 169.01424 | 4.85 | 125.1 | Gallic acid |
| 8 | 25.76 | C15H10O7 | [M-H]- | 301.0360 | 301.03537 | 1.93 | 151.00, 121.03, 107.01, 179.00 | Quercetin |
| 9 | 27.94 | C15H10O6 | [M-H]- | 285.0409 | 285.04046 | 1.61 | 211.04, 227.03, 239.03 | Kaempferol |

Table S2. Histopathological score in each group.

| Group | Epithelial damage | Microvillus status | Tight junction integrity | Mitochondrial morphology | Histopathological score |
| --- | --- | --- | --- | --- | --- |
| CON | 0 | 0 | 0 | 0 | 0 |
| HH | 2 | 2 | 2 | 2 | 8 |
| CD-CON | 0 | 0 | 0 | 0 | 0 |
| CD-HH | 1 | 1 | 1 | 1 | 4 |
